# Supplementary material for: A new strategy for achieving high K+ storage capacity with fast kinetics: realizing covalent sulfur-rich carbon by phosphorous doping
Source: Royal Society of Chemistry journal article supplement (doi:10.1039/d0nr09011e), 2021-01-01
Supplement: d0nr09011e1.pdf [file d0nr09011e1.pdf]

Supporting Information for

**A New Strategy for Achieving High K<sup>+</sup> Storage Capacity with Fast Kinetics:  
Realizing Covalent Sulfur-Rich Carbon by Phosphorous Doping**

Wenrui Wei,<sup>a</sup> Yulong Zheng,<sup>c</sup> Minghua Huang,<sup>a</sup> Jing Shi,<sup>a</sup> Lei Li,<sup>b</sup> Zhicheng Shi,<sup>a</sup> Shuai Liu<sup>a</sup>  
and Huanlei Wang<sup>a\*</sup>,

*<sup>a</sup> School of Materials Science and Engineering, Ocean University of China, Qingdao 266100, People's Republic of China.*

*<sup>b</sup> Key Laboratory of Extraordinary Bond Engineering and Advanced Materials Technology (EBEAM) of Chongqing, Yangtze Normal University, Chongqing 408100, People's Republic of China.*

*<sup>c</sup> New Energy R&D Center/New Energy Powertrain Dept, Weichai Power Co.,Ltd, Weifang 261061, People's Republic of China.*

\*Corresponding author.

E-mail:huanleiwang@gmail.com (Prof. H. Wang)

## Figures

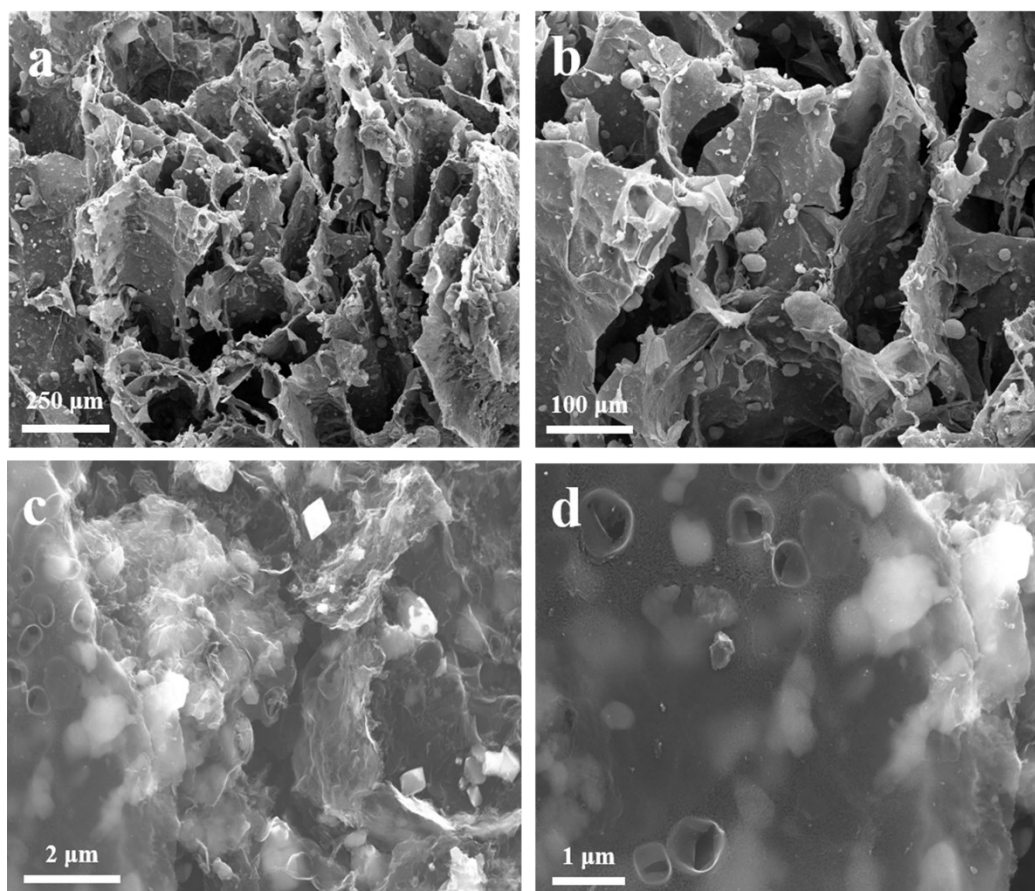

**Fig. S1** Representative SEM image of (a, b) magnesium phosphate pentahydrate dispersed in carrageenan, and (c,d) the PSMC sample before washing with HCl.

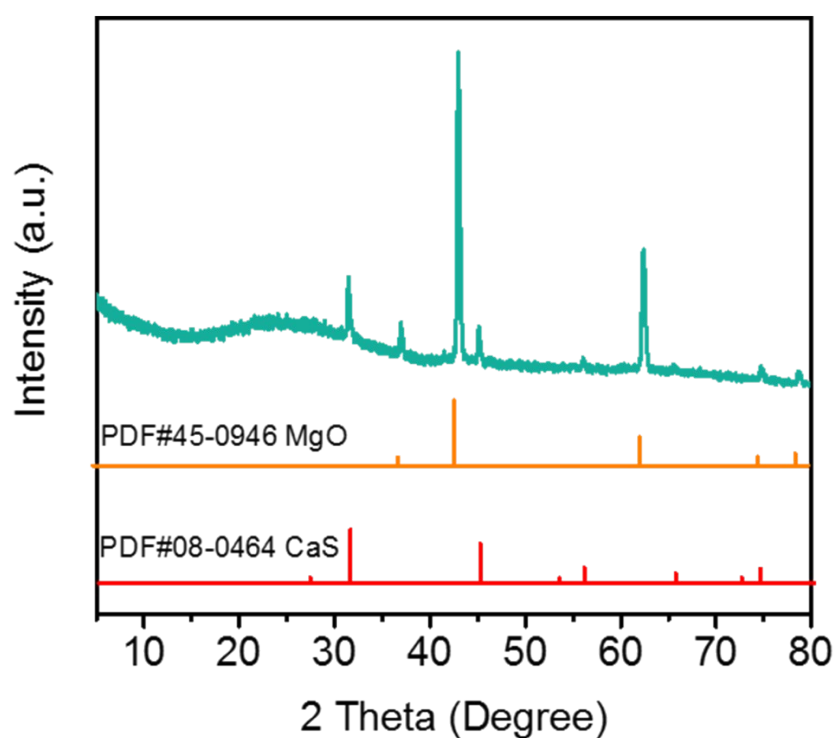

**Fig. S2** The XRD pattern of PSMC without acid-treatment. (As evidenced in the XRD spectrum, the generation of MgO is due to the decomposition of magnesium phosphate pentahydrate during the carbonization process at 1200°C. There is ester-sulfate and a slight amount of  $\text{Ca}^{2+}$  in carrageenan, the decomposition of ester-sulfate achieved S-doped while partially binding with  $\text{Ca}^{2+}$  to form CaS.<sup>1)</sup>)

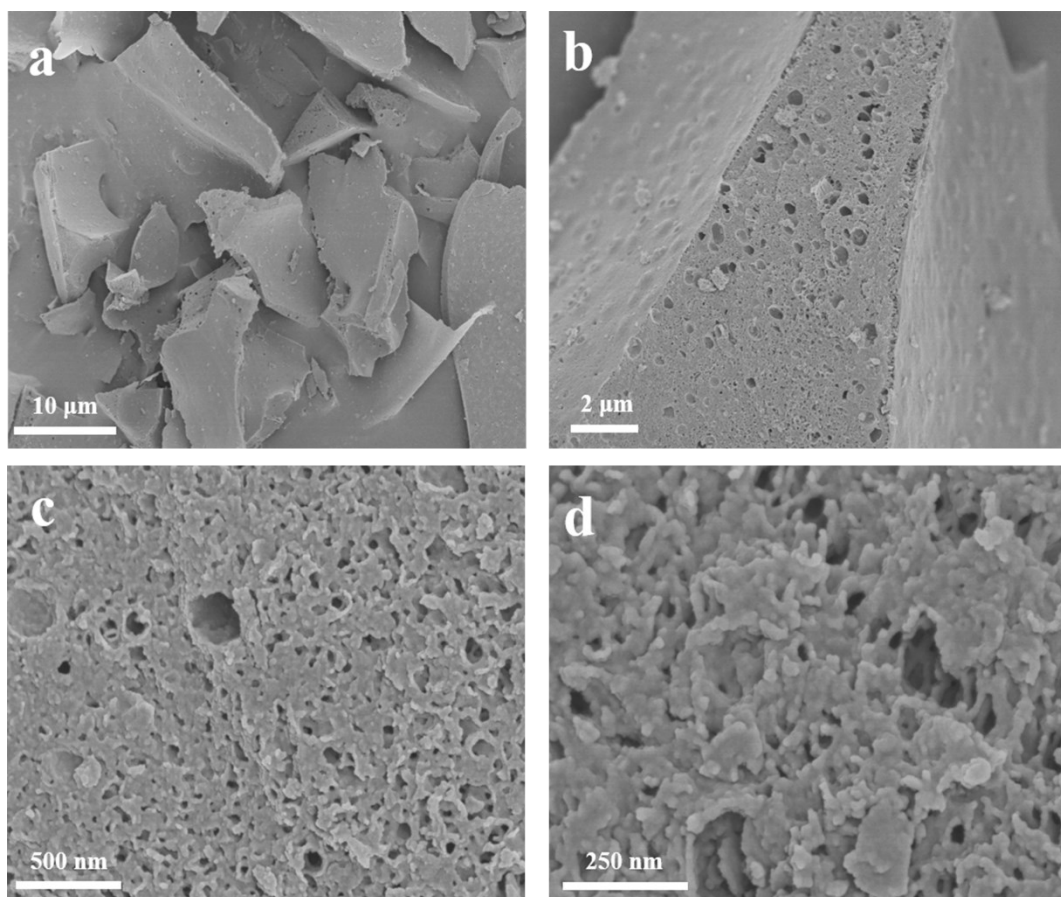

**Fig. S3** Representative SEM images of SMC.

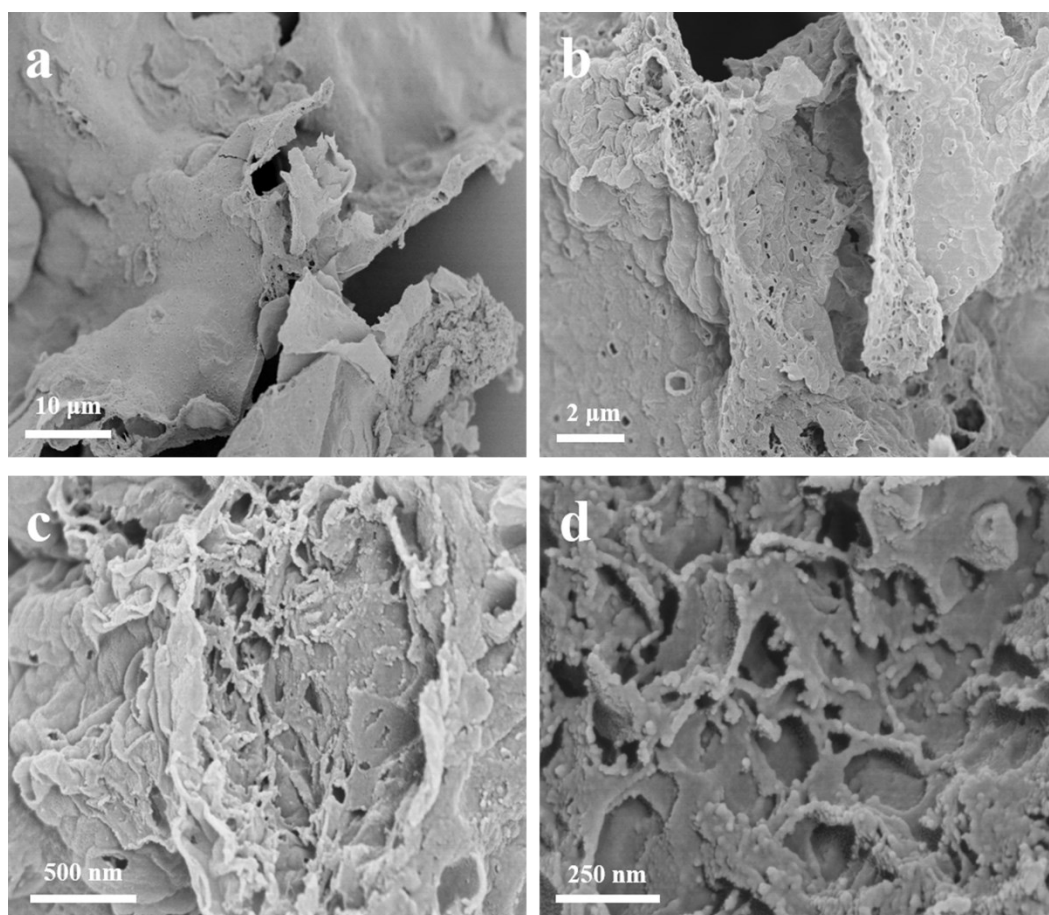

**Fig. S4** Representative SEM images of PSMC.

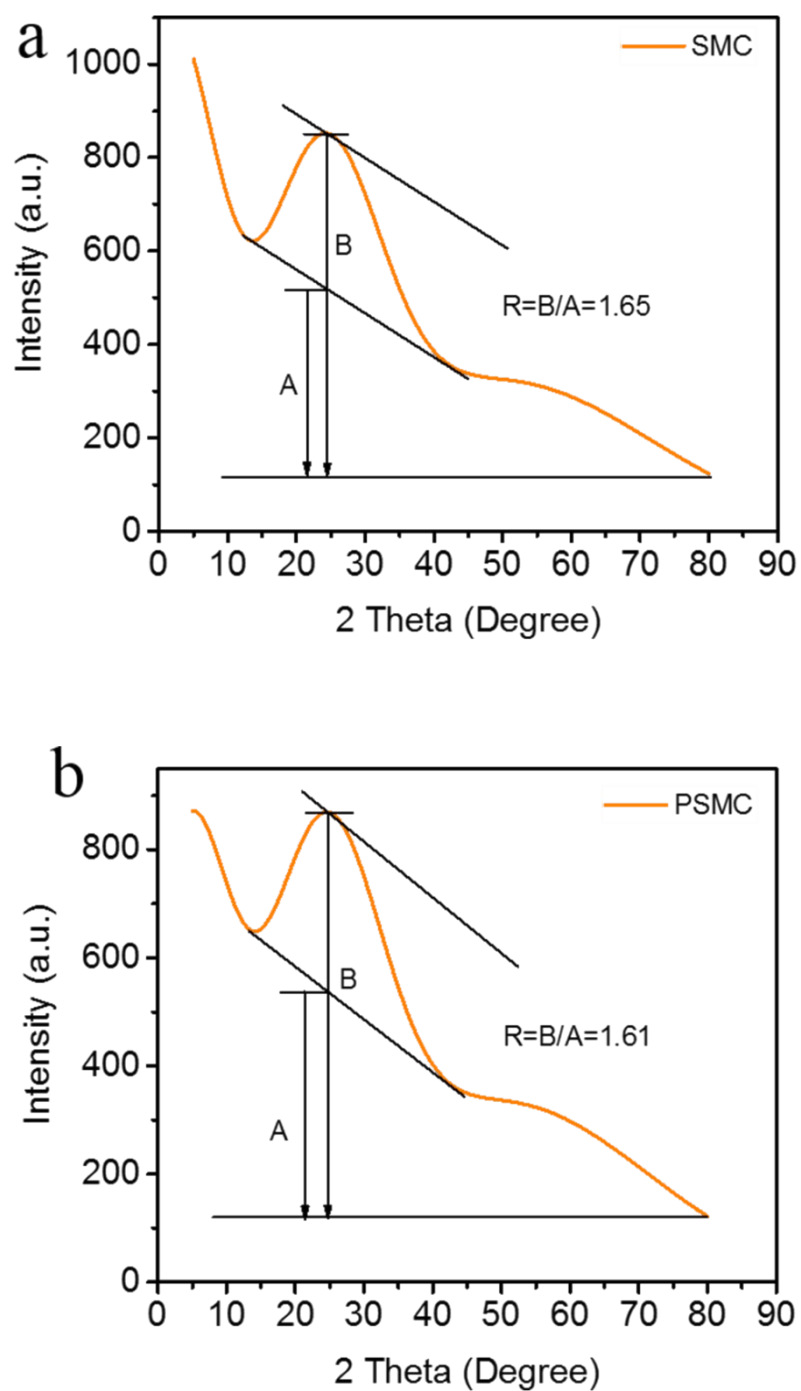

**Fig. S5** Scheme illustrating the calculation of R values based on XRD patterns for (a) SMC and (b) PSMC.

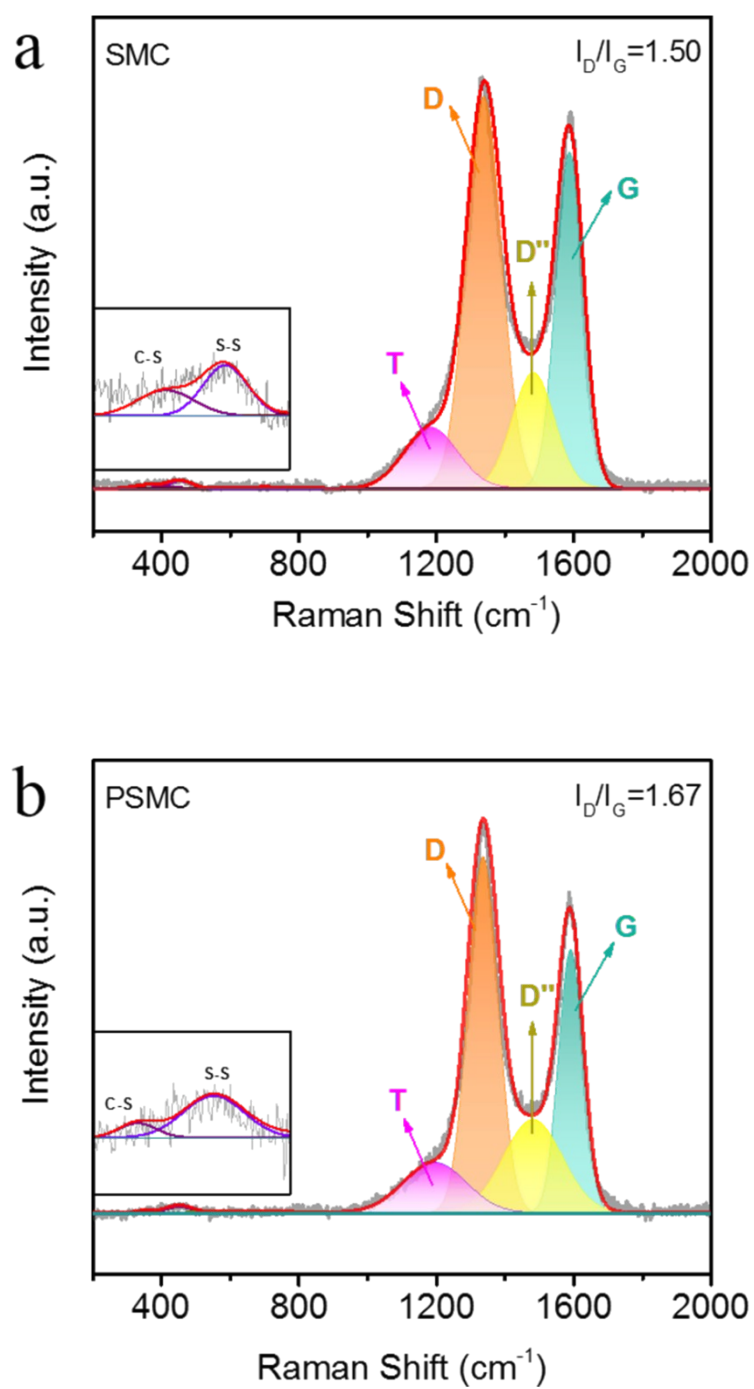

**Fig. S6** Curve fitting results for the Raman spectra of (a) SMC and (b) PSMC.

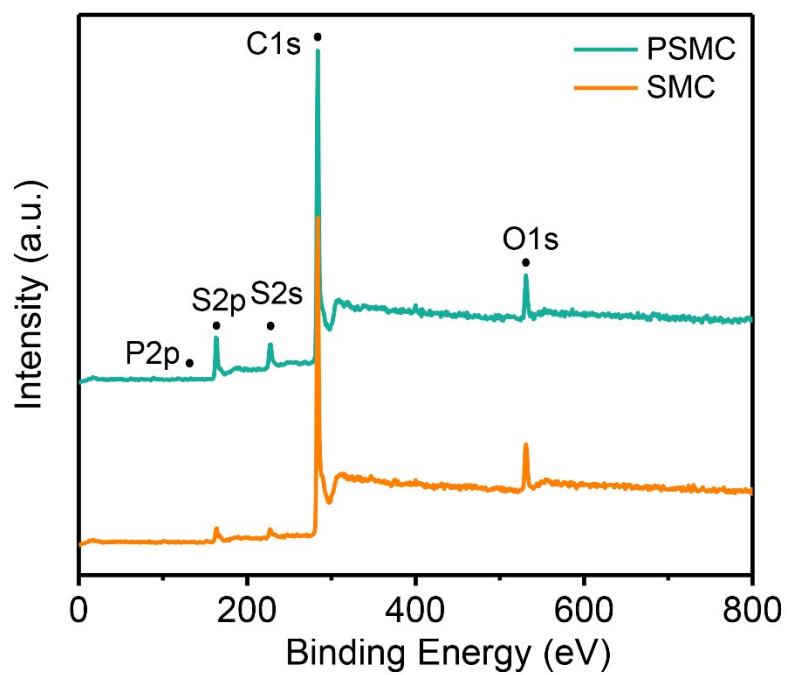

**Fig. S7** The XPS survey spectra of SMC and PSMC.



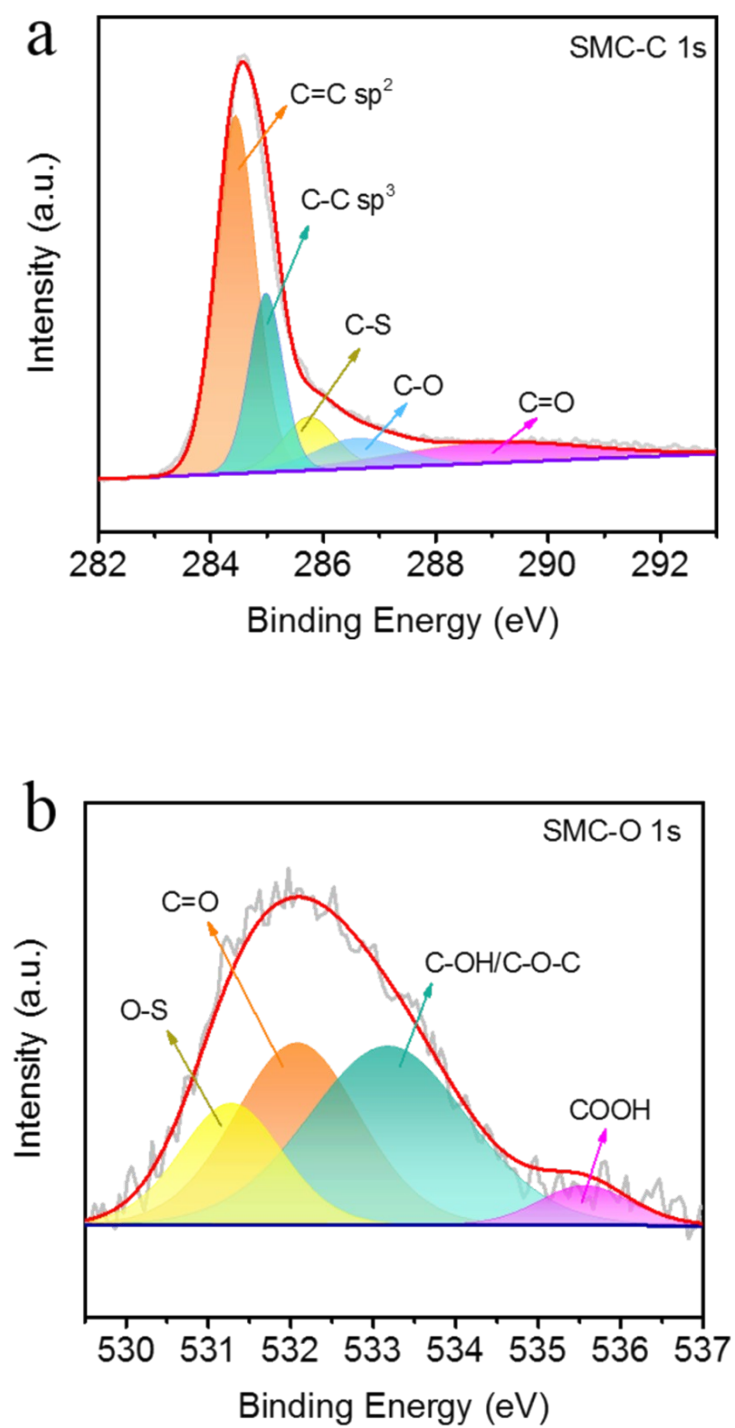

**Fig. S8** High-resolution (a) C 1s and (b) O 1s XPS spectra for SMC.

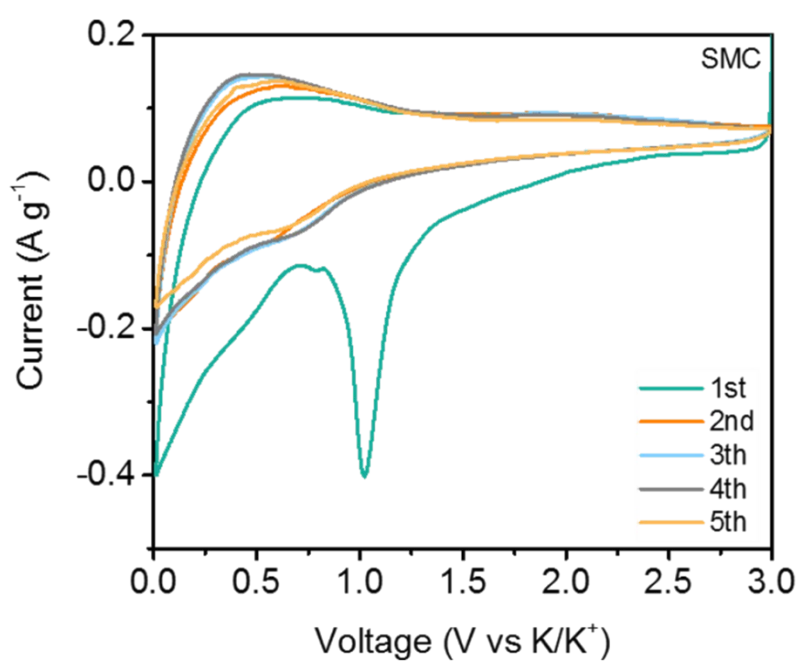

**Fig. S9** CV curves of the SMC electrode at a scan rate of  $0.1 \text{ mV s}^{-1}$

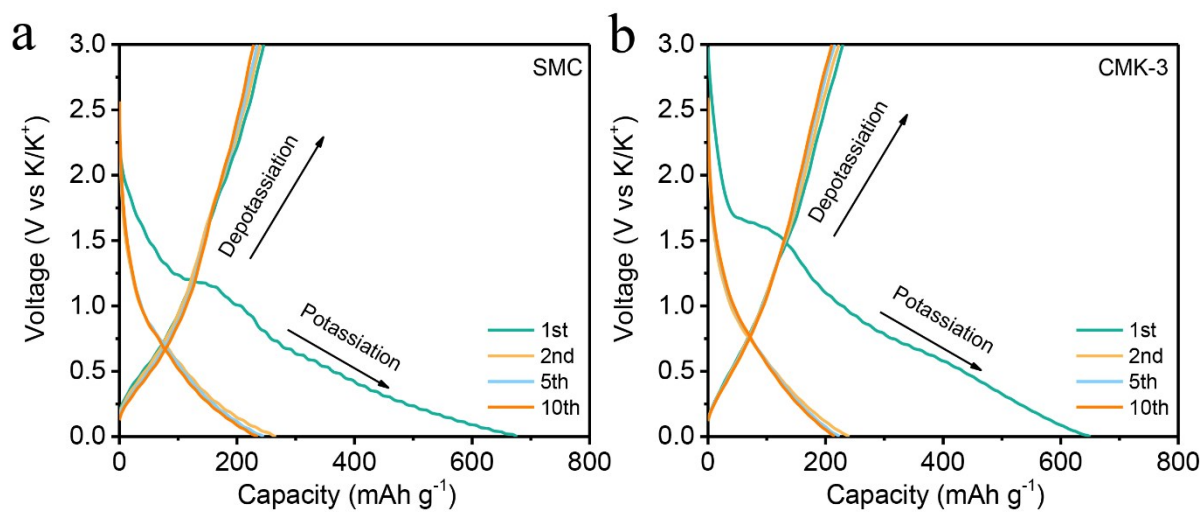

**Fig. S10** Galvanostatic discharge-charge profiles at a current density of  $0.1 \text{ A g}^{-1}$  of (a) SMC and (b) CMK-3.

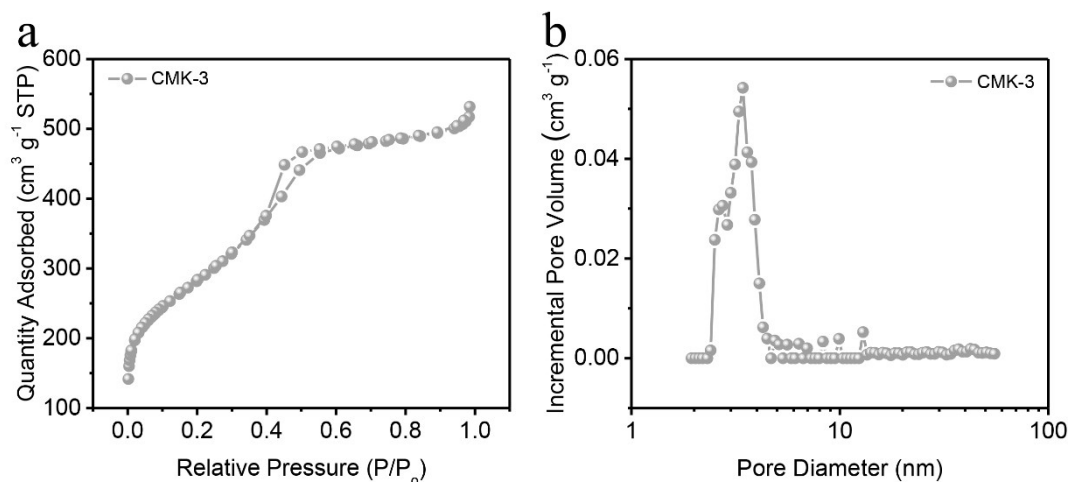

**Fig. S11** (a)  $N_2$  adsorption-desorption isotherm and (b) the corresponding DFT pore size distribution of CMK-3.

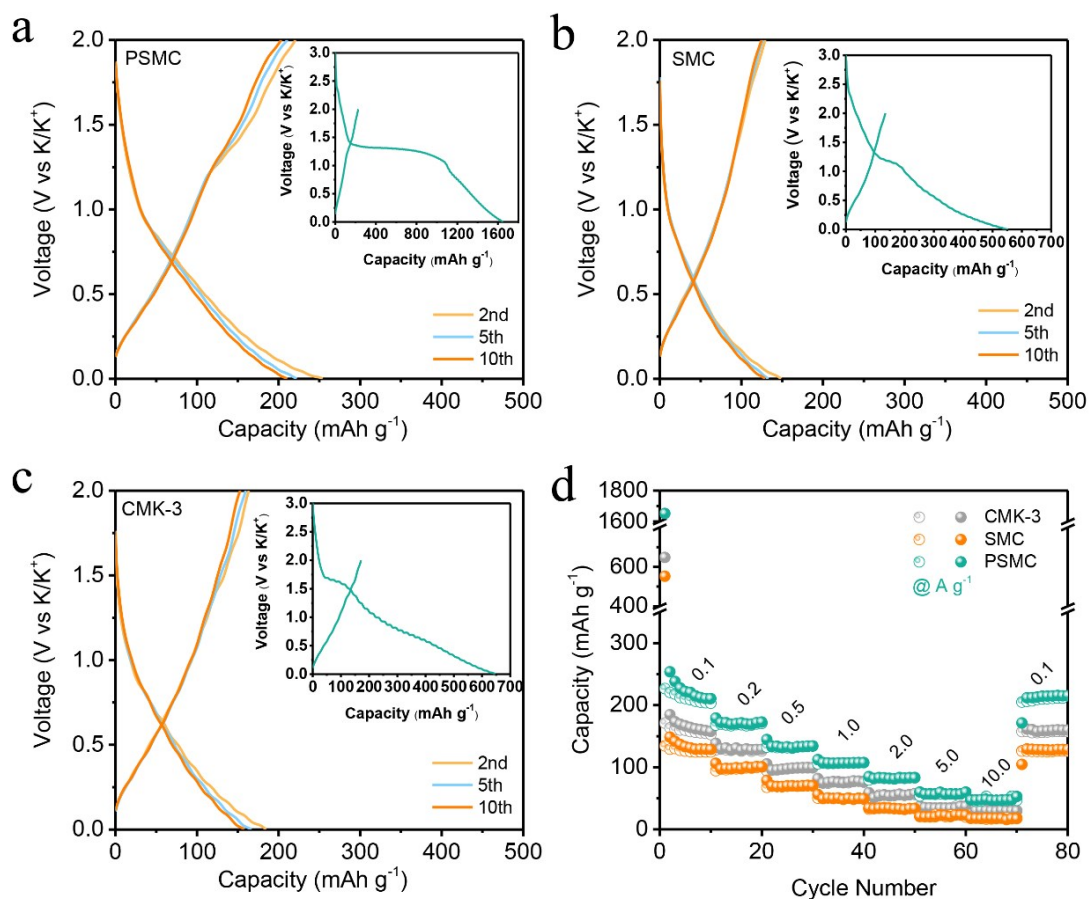

**Fig. S12** Galvanostatic discharge-charge profiles of (a) PSMC, (b) SMC, (c) CMK-3 at 0.1  $\text{A g}^{-1}$  and the cut-off voltage of 2.0 V (inset is the first cycle); (d) Rate capability of PSMC, SMC, and CMK-3.

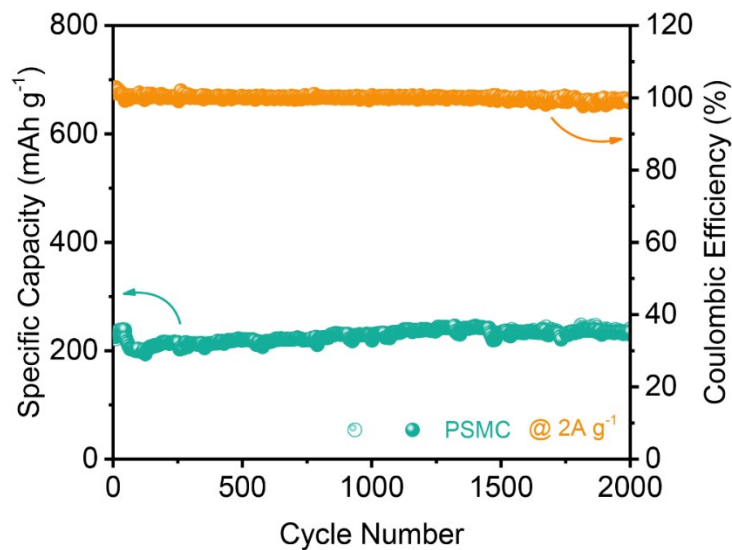

**Fig. S13** Long cycling performance of PSMC at 2.0 A g<sup>-1</sup>.

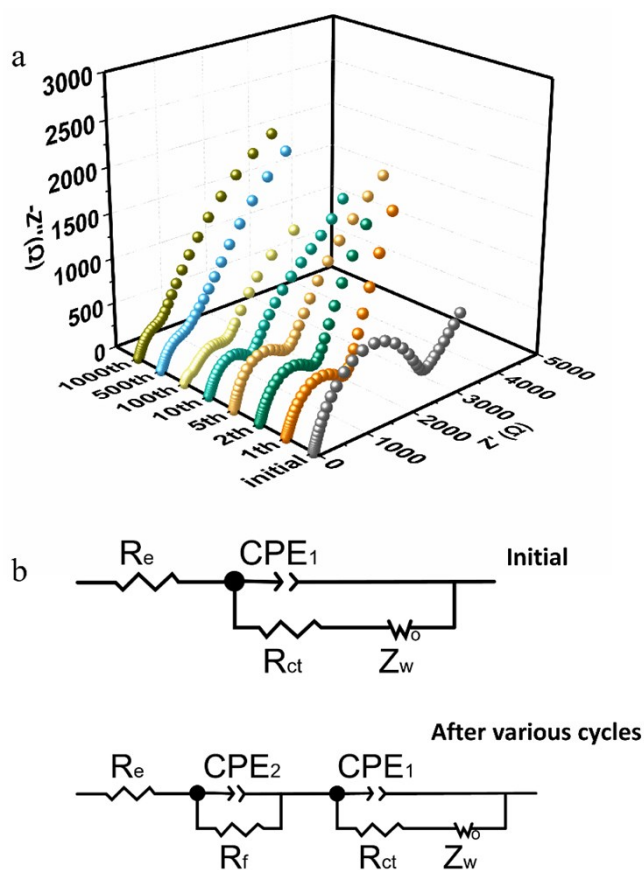

**Fig. S14** (a) Nyquist plots of the SMC electrode, analyzed at initial and after various cycles. (b) The equivalent electrical circuit of the EIS fitting ( $R_e$  is the internal resistance,  $CPE_1$  and  $CPE_2$  are constant phase elements,  $R_{ct}$  represents charge transfer resistance,  $R_f$  represents the resistance of potassium transport through SEI layer, and  $Z_w$  is Warburg impedance).

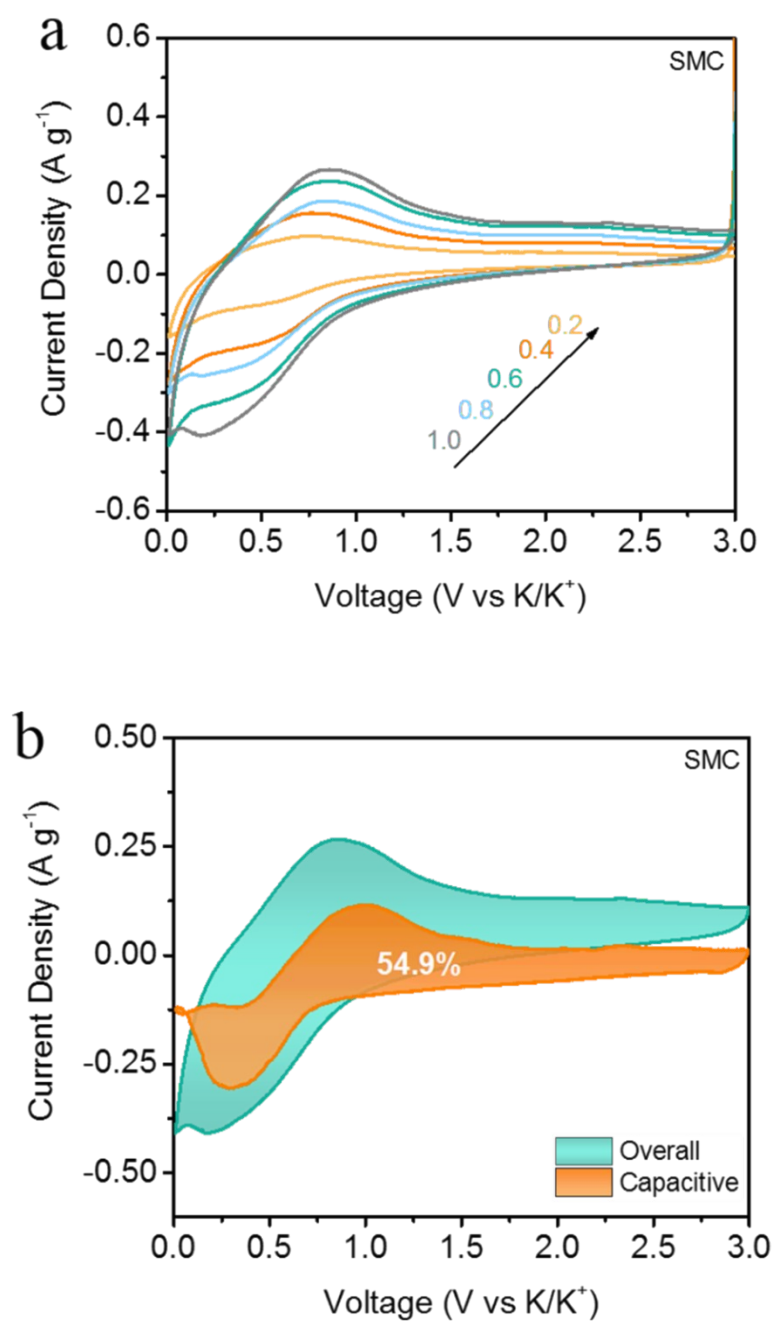

**Fig. S15** (a) CV curves of SMC at various scan rates. (b) Capacitive contribution for SMC at 1.0  $\text{mV s}^{-1}$ .

### Galvanostatic intermittent titration technique (GITT)

The first cycle is tested by GCD with a current density of  $0.1 \text{ A g}^{-1}$ , and the second cycle is examined by GITT. The specific test condition is to apply a constant current of  $0.03 \text{ A g}^{-1}$  pulse for 30 minutes to a PIB half-cell with PSMC/SMC as the anode, and then relax for 3 hours. The  $\text{K}^+$  diffusion coefficients can be quantitatively calculated according to GITT curves by using the following Equation:

$$D = \frac{4}{\pi} \left( \frac{mV_B}{M_B S} \right) \left( \frac{\Delta E_s}{\Delta E_\tau} \right)^2$$

where  $m$  and  $M_B$  are the mass (g) and molar weight ( $\text{g mol}^{-1}$ ) of active material, and  $S$  is the geometric contact area ( $\text{cm}^2$ ) between electrolyte and electrode,  $V_B$  is the molar volume ( $\text{cm}^3 \text{ mol}^{-1}$ ) of active materials, and  $\tau$  is current pulse duration (s).  $\Delta E_s$  and  $\Delta E_\tau$  are the potential change in a complete pulse-relaxation procedure which can be obtained from the Figure S14.

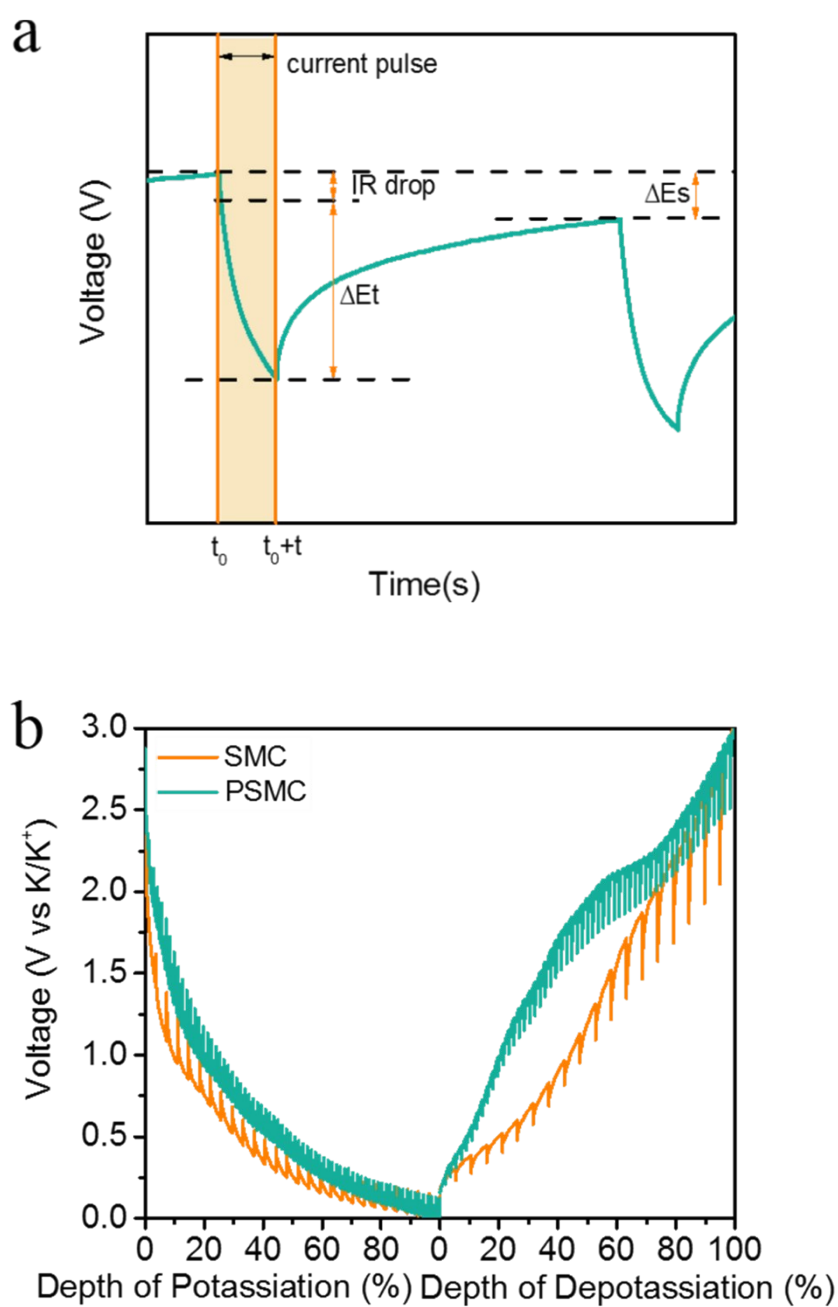

**Fig. S16** (a) The schematic illustration for the GITT calculation method. (b) GITT curves for SMC and PSMC.

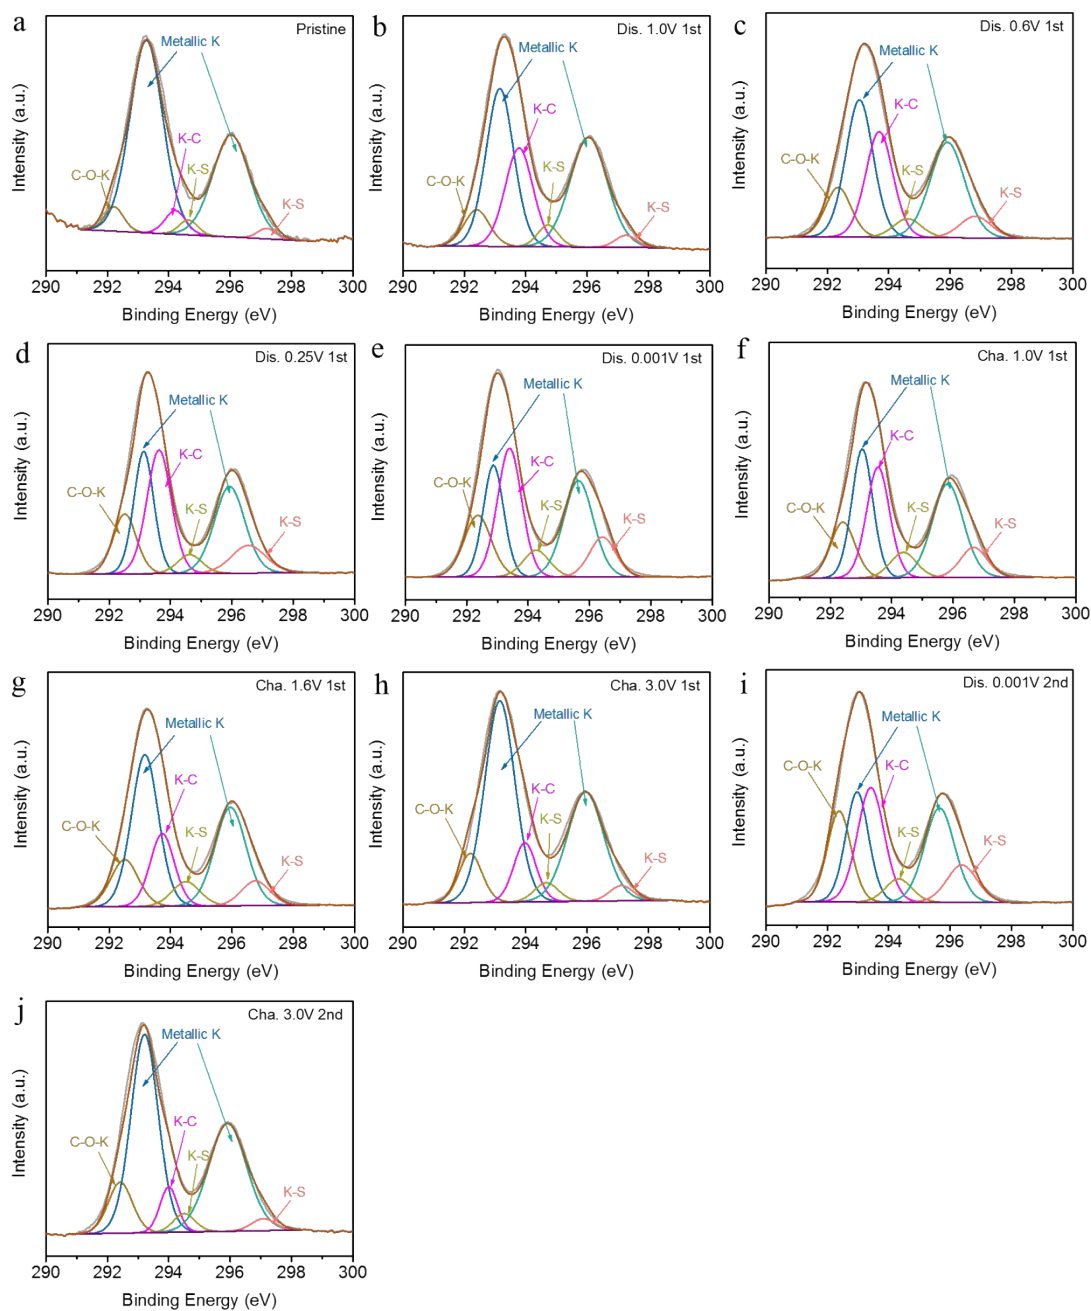

**Fig. S17** Deconvolution of K 2p peaks for PSMC at various discharge/charge voltages, during cycle 1 and cycle 2: (a) pristine; (b) discharge to 1.0V (cycle 1); (c) discharge to 0.6V (cycle 1); (d) discharge to 0.25V (cycle 1); (e) discharge to 0.001V (cycle 1); (f) charge to 1.0V (cycle 1); (g) charge to 1.6V (cycle 1); (h) charge to 3.0V (cycle 1); (i) discharge to 0.001V (cycle 2); (j) charge to 3.0V (cycle 2).



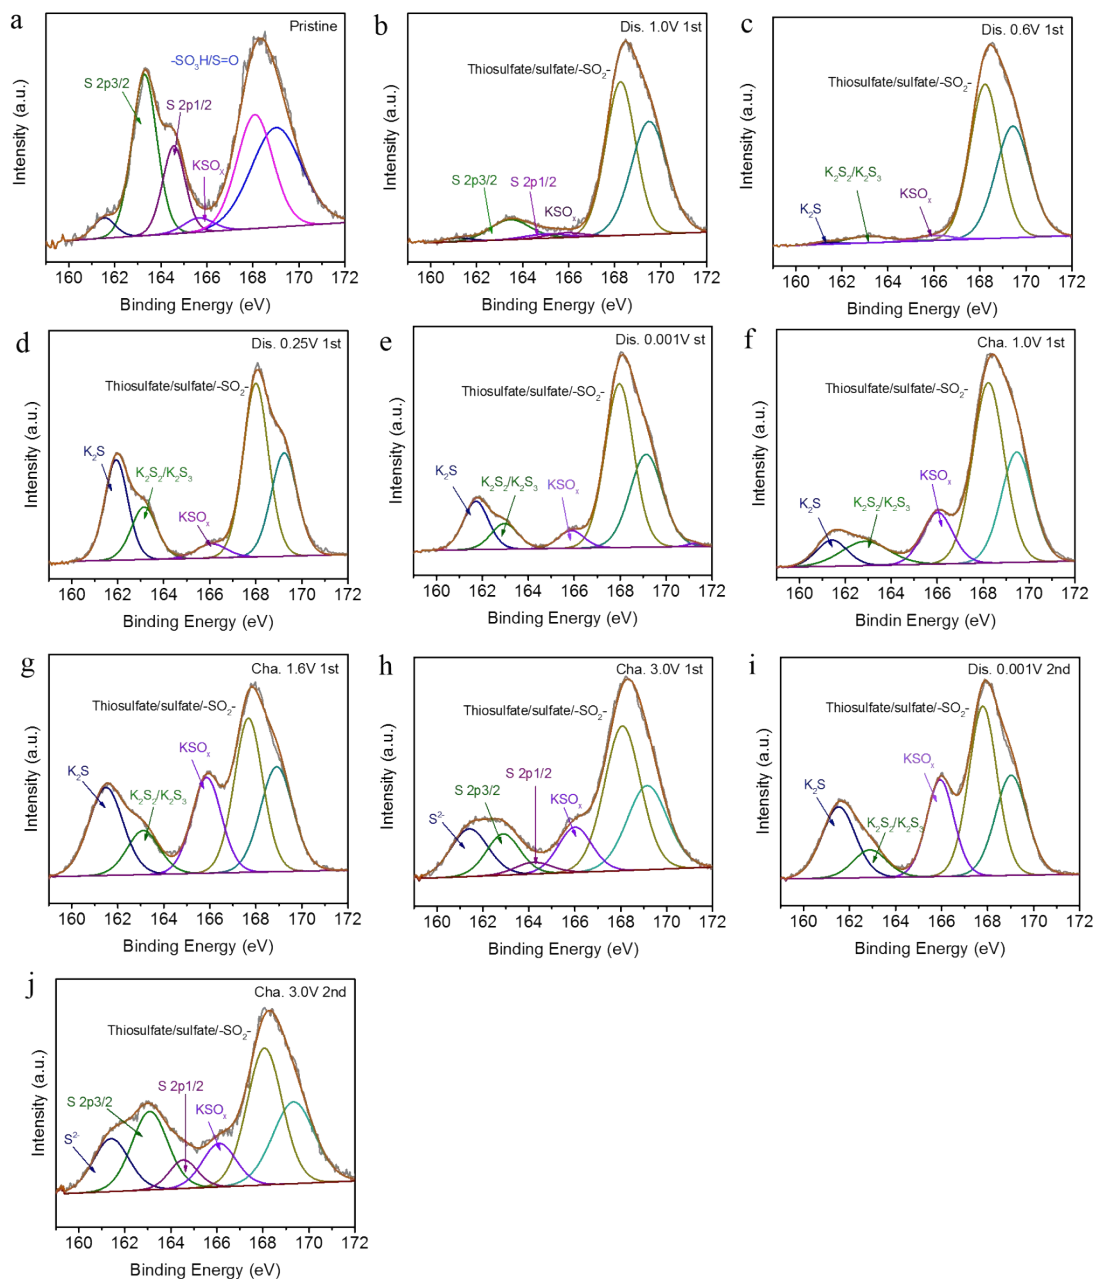

**Fig. S18** Deconvolution of S 2p peaks for PSMC at various discharge/charge voltages, during cycle 1 and cycle 2: (a) pristine; (b) discharge to 1.0V (cycle 1); (c) discharge to 0.6V (cycle 1); (d) discharge to 0.25V (cycle 1); (e) discharge to 0.001V (cycle 1); (f) charge to 1.0V (cycle 1); (g) charge to 1.6V (cycle 1); (h) charge to 3.0V (cycle 1); (i) discharge to 0.001V (cycle 2); (j) charge to 3.0V (cycle 2).

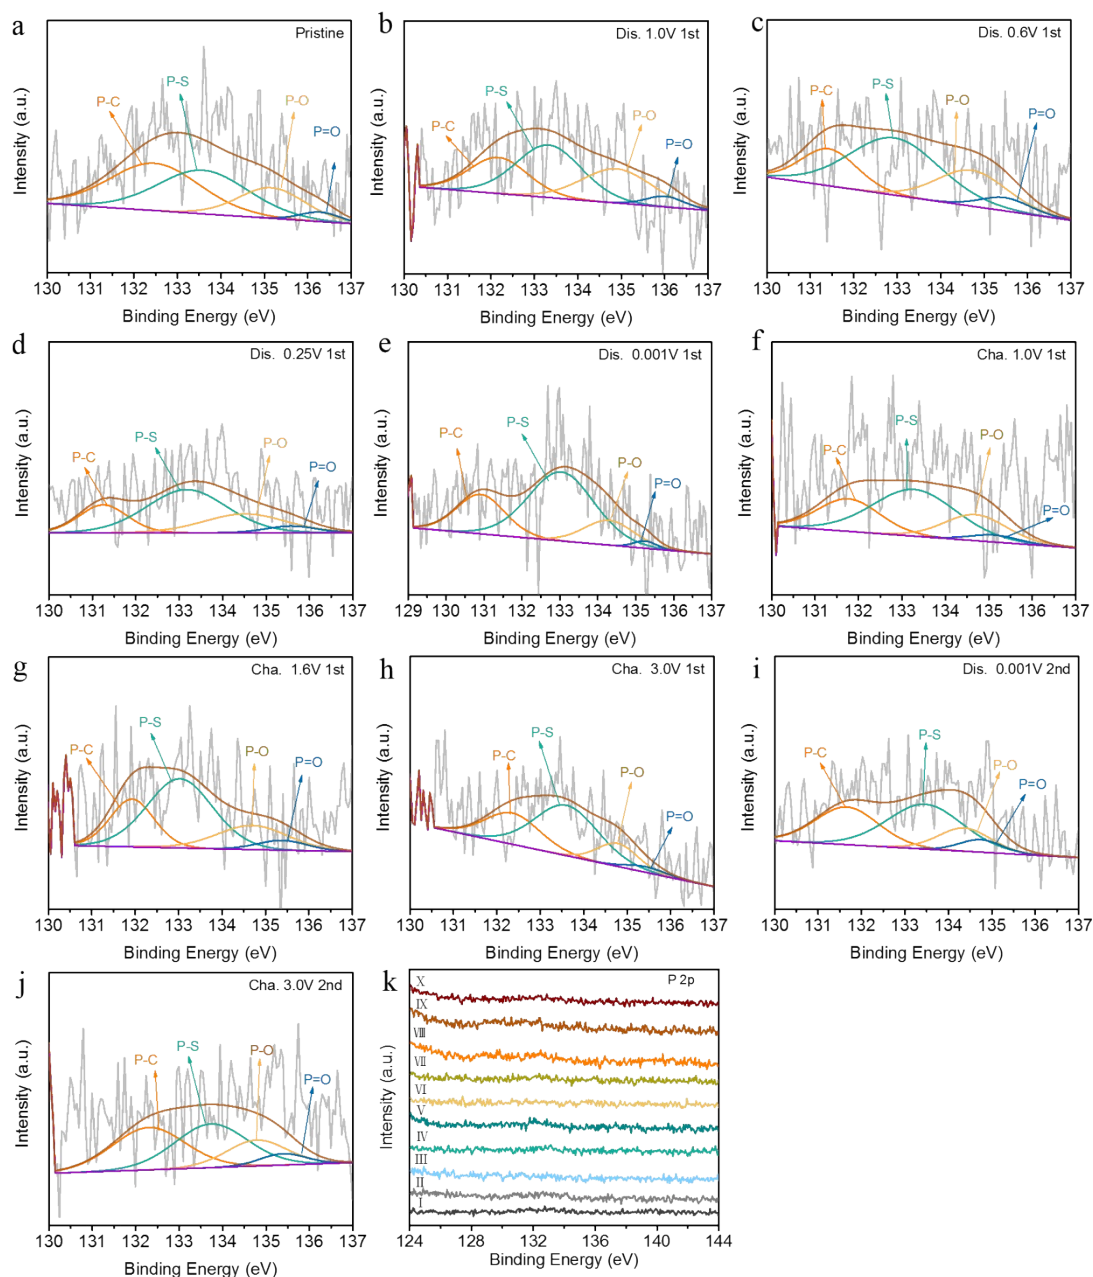

**Fig. S19** Deconvolution of P 2p peaks for PSMC at various discharge/charge voltages, during cycle 1 and cycle 2: (a) pristine; (b) discharge to 1.0V (cycle 1); (c) discharge to 0.6V (cycle 1); (d) discharge to 0.25V (cycle 1); (e) discharge to 0.001V (cycle 1); (f) charge to 1.0V (cycle 1); (g) charge to 1.6V (cycle 1); (h) charge to 3.0V (cycle 1); (i) discharge to 0.001V (cycle 2); (j) charge to 3.0V (cycle 2); (k) *Ex-situ* XPS spectra of P 2p for PSMC.

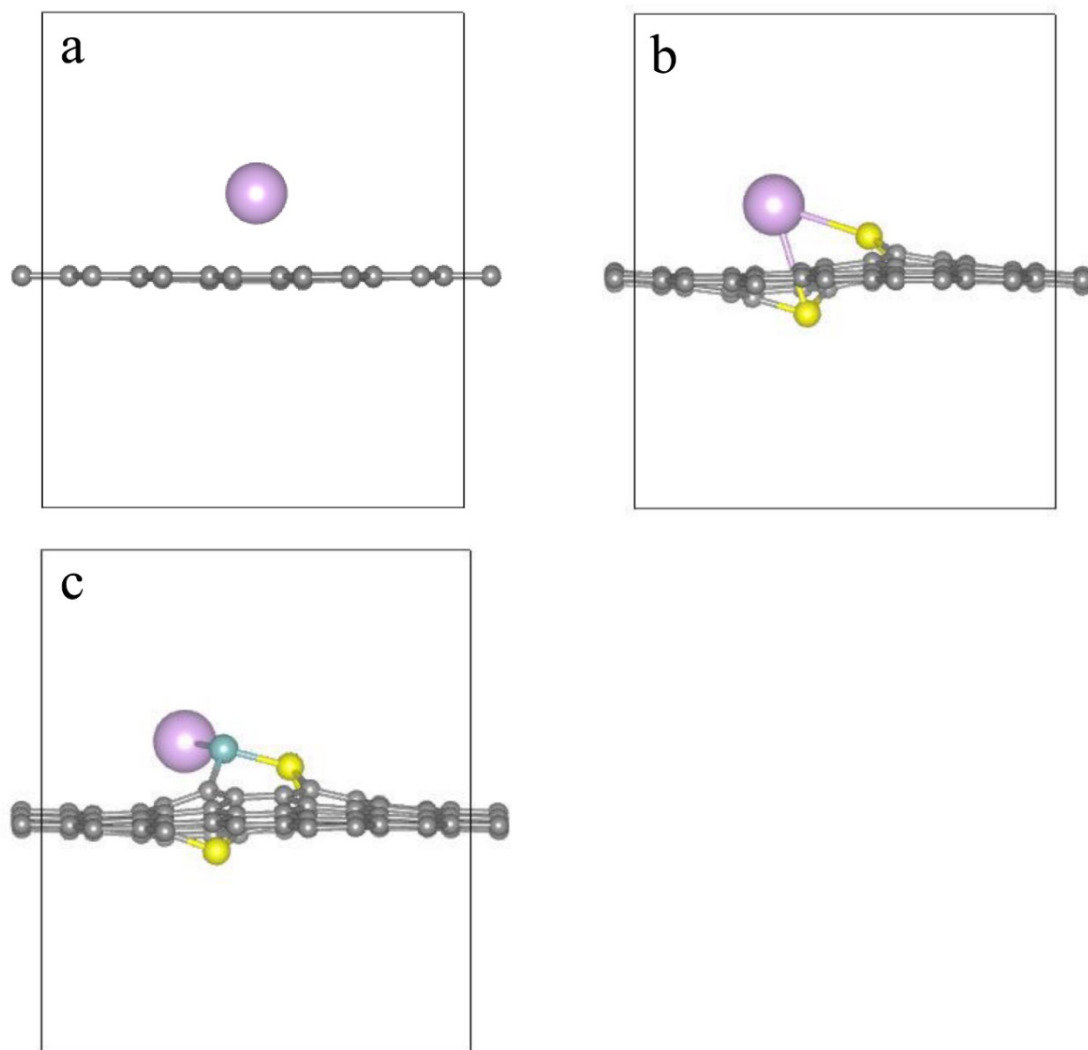

**Fig. S20** Side view of the structure of (a) Graphene, (b) S-Graphene and (c) P/S-Graphene.

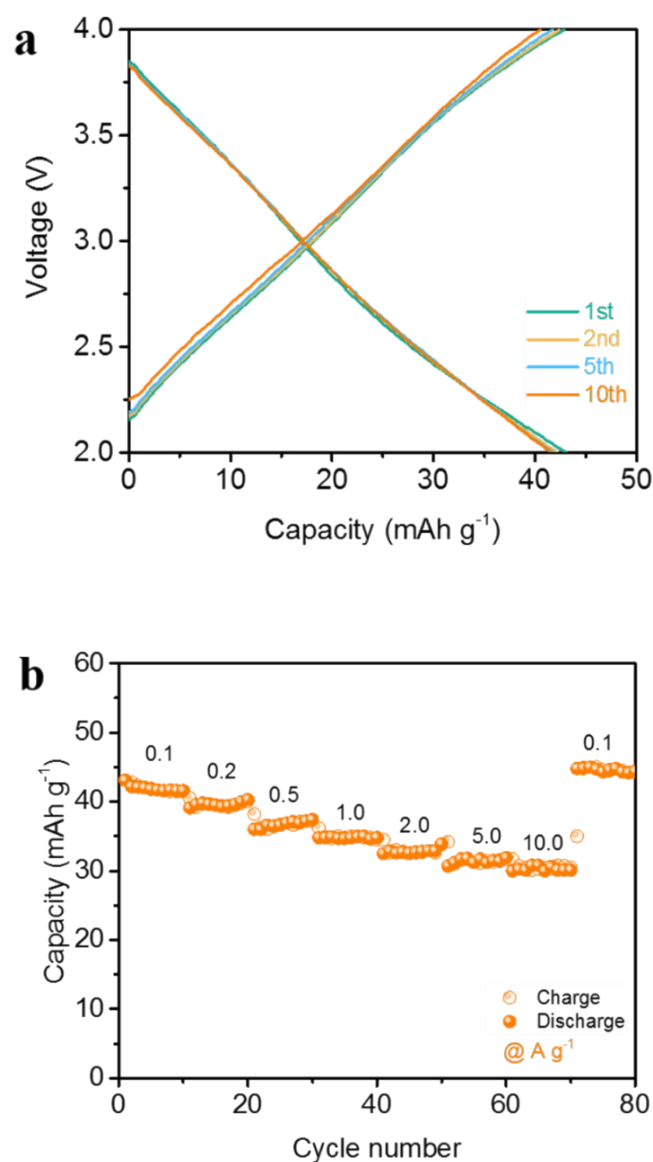

**Fig. S21** Electrochemical performance of NPC as PIBs cathode in half cells. (a) Galvanostatic discharge-charge profiles of NPC at  $0.1 \text{ A g}^{-1}$ ; (b) Rate capability of NPC. (The preparation process of NPC sample is as follows: Typically, 2.0 g potassium hydroxide and 10.0 g sodium bicarbonate were dissolved in deionized water, and then 2.0 g methyl cellulose and 2.0 g urea were added into the solution with continuously stirred for 4 hours. After freeze-drying, the precursor was carbonized under  $\text{N}_2$  ( $200^\circ \text{C}$  for 2 hours and  $800^\circ \text{C}$  for 4 hours), washed by 2M HCl and  $\text{H}_2\text{O}$ , and dried at  $80^\circ \text{C}$  in vacuum oven). <sup>2</sup>

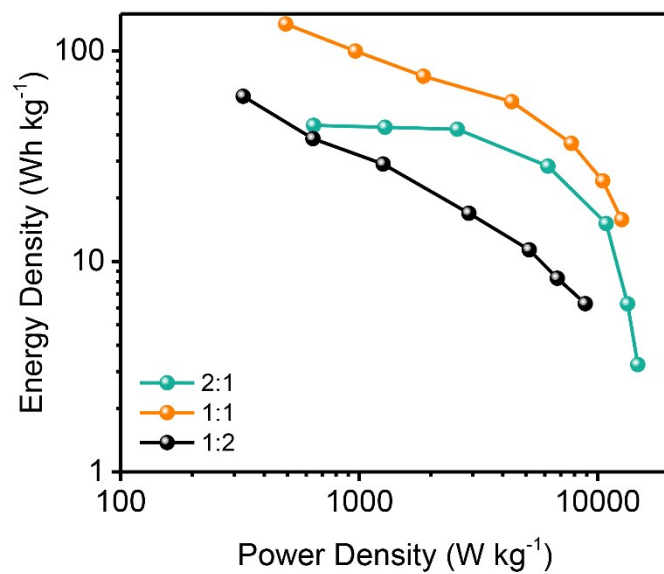

**Fig. S22.** Ragone plots of the PICs with different anode to cathode mass ratios (1:2, 1:1 and 2:1).

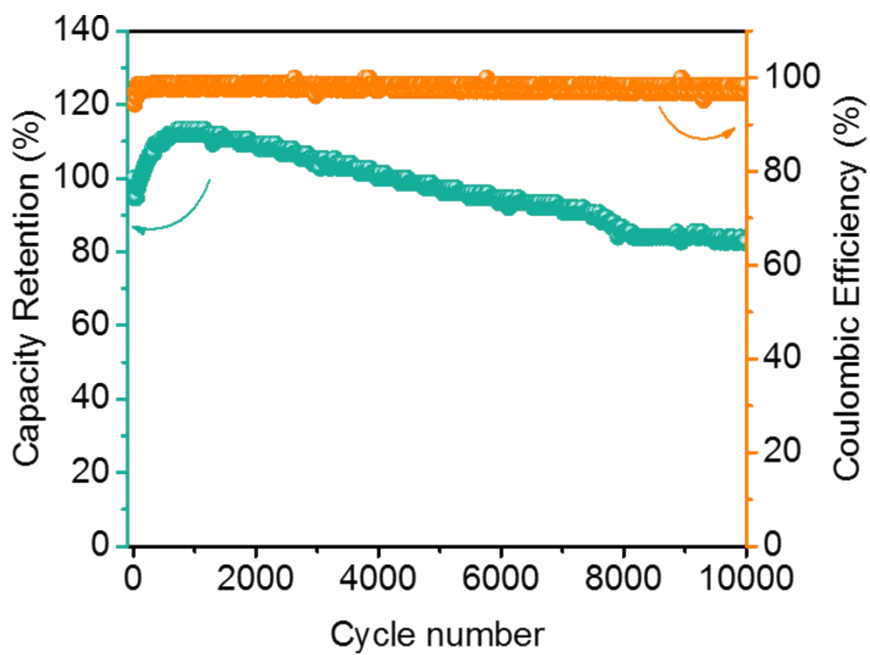

**Figure S23.** The long-cycle performance of PIC at  $50 \text{ A g}^{-1}$ .

**Table S1.** Textural properties and surface chemistry of SMC and PSMC.

| Sample | Textural Properties              |                                   |                   |                   | Surface Chemistry (XPS) |      |       |      | $I_D/I_G$ |
|--------|----------------------------------|-----------------------------------|-------------------|-------------------|-------------------------|------|-------|------|-----------|
|        | $S_{BET}$                        | $V_{total}$                       | Pore Volume (%)   |                   | C                       | O    | S     | P    |           |
|        | $\text{m}^2 \cdot \text{g}^{-1}$ | $\text{cm}^3 \cdot \text{g}^{-1}$ | $V_{<2\text{nm}}$ | $V_{>2\text{nm}}$ | wt%                     | wt%  | wt%   | wt%  |           |
| SMC    | 856                              | 1.49                              | 38.50             | 61.50             | 85.84                   | 7.05 | 7.11  | —    | 1.50      |
| PSMC   | 961                              | 3.15                              | 12.58             | 87.42             | 76.36                   | 6.08 | 16.48 | 1.08 | 1.67      |

**Table S2.** Carbon bonding analysis of SMC and PSMC samples.

| Binding Energy (eV)                     | Carbon Bonding | Concentration (%/at %) |             |
|-----------------------------------------|----------------|------------------------|-------------|
|                                         |                | SMC                    | PSMC        |
| 284.4                                   | C=C            | 48.62/44.50            | 46.07/40.20 |
| 285.0                                   | C-C            | 20.29/18.57            | 24.49/21.37 |
| 285.8                                   | C-S            | 9.27/8.48              | 12.44/10.86 |
| 286.8                                   | C-O            | 8.61/7.88              | 6.60/5.76   |
| 289.3                                   | C=O            | 13.21/12.09            | 9.19/8.02   |
| 283.4                                   | C-P            | —                      | 1.20/1.05   |
| $\text{Sp}^2/(\text{Sp}^2+\text{Sp}^3)$ |                | 70.56                  | 65.29       |

**Table S3.** Comparisons of electrochemical performance of PSMC with other carbon anodes for PIBs.

| Anode Materials        | Rate capability                                                                                                                                                                                                                                                                                                                                                                                                  | Cycling Performance                                                               |
|------------------------|------------------------------------------------------------------------------------------------------------------------------------------------------------------------------------------------------------------------------------------------------------------------------------------------------------------------------------------------------------------------------------------------------------------|-----------------------------------------------------------------------------------|
| PSMC (This work)       | <b>449 mAh g<sup>-1</sup> at 0.1 A g<sup>-1</sup>,</b><br><b>407 mAh g<sup>-1</sup> at 0.2 A g<sup>-1</sup>,</b><br><b>355 mAh g<sup>-1</sup> at 0.5 A g<sup>-1</sup>,</b><br><b>299 mAh g<sup>-1</sup> at 1.0 A g<sup>-1</sup>,</b><br><b>233 mAh g<sup>-1</sup> at 2.0 A g<sup>-1</sup>,</b><br><b>136 mAh g<sup>-1</sup> at 5.0 A g<sup>-1</sup></b><br><b>98 mAh g<sup>-1</sup> at 10.0 A g<sup>-1</sup></b> | <b>217.1 mAh g<sup>-1</sup> after 1000</b><br><b>cycles at 2 A g<sup>-1</sup></b> |
| CFM-S30NG <sup>3</sup> | 306.8 mAh g <sup>-1</sup> at 0.05 A g <sup>-1</sup> ,<br>279.2 mAh g <sup>-1</sup> at 0.1 A g <sup>-1</sup> ,<br>269.1 mAh g <sup>-1</sup> at 0.2 A g <sup>-1</sup> ,<br>245.0 mAh g <sup>-1</sup> at 0.5 A g <sup>-1</sup> ,<br>222.7 mAh g <sup>-1</sup> at 1.0 A g <sup>-1</sup>                                                                                                                              | 188.8 mAh g <sup>-1</sup> after 200<br>cycles at 1 A g <sup>-1</sup>              |
| S-RGO-600 <sup>4</sup> | 435 mAh g <sup>-1</sup> at 0.05 A g <sup>-1</sup> ,<br>297 mAh g <sup>-1</sup> at 0.1 A g <sup>-1</sup> ,<br>282 mAh g <sup>-1</sup> at 0.25 A g <sup>-1</sup> ,<br>250 mAh g <sup>-1</sup> at 0.5 A g <sup>-1</sup> ,<br>224 mAh g <sup>-1</sup> at 1.0 A g <sup>-1</sup>                                                                                                                                       | 229 mAh g <sup>-1</sup> after 500<br>cycles at 1 A g <sup>-1</sup>                |
| S/NCNFAs <sup>5</sup>  | 356 mAh g <sup>-1</sup> at 0.1 A g <sup>-1</sup> ,<br>260 mAh g <sup>-1</sup> at 0.2A g <sup>-1</sup> ,<br>220 mAh g <sup>-1</sup> at 0.5 A g <sup>-1</sup> ,<br>198 mAh g <sup>-1</sup> at 1.0 A g <sup>-1</sup> ,<br>168 mAh g <sup>-1</sup> at 2.0 A g <sup>-1</sup> ,<br>112 mAh g <sup>-1</sup> at 5.0 A g <sup>-1</sup> ,                                                                                  | 168 mAh g <sup>-1</sup> after 1000<br>cycles at 2 A g <sup>-1</sup>               |
| CNFF <sup>6</sup>      | 240 mAh g <sup>-1</sup> at 0.05 A g <sup>-1</sup> ,<br>236 mAh g <sup>-1</sup> at 0.08A g <sup>-1</sup> ,                                                                                                                                                                                                                                                                                                        | 141 mAh g <sup>-1</sup> after 2000<br>cycles at 1 A g <sup>-1</sup>               |

|                       |                                                                                                                                                                                                                                                                                                                                                                                                                                                                                                    |                                                                     |
|-----------------------|----------------------------------------------------------------------------------------------------------------------------------------------------------------------------------------------------------------------------------------------------------------------------------------------------------------------------------------------------------------------------------------------------------------------------------------------------------------------------------------------------|---------------------------------------------------------------------|
|                       | 214 mAh g <sup>-1</sup> at 0.1 A g <sup>-1</sup> ,<br>202 mAh g <sup>-1</sup> at 0.2 A g <sup>-1</sup> ,<br>181 mAh g <sup>-1</sup> at 0.5 A g <sup>-1</sup> ,<br>164 mAh g <sup>-1</sup> at 1.0 A g <sup>-1</sup> ,                                                                                                                                                                                                                                                                               |                                                                     |
| H-OS-C <sup>7</sup>   | 409 mAh g <sup>-1</sup> at 0.1 A g <sup>-1</sup> ,<br>322 mAh g <sup>-1</sup> at 0.2 A g <sup>-1</sup> ,<br>255 mAh g <sup>-1</sup> at 0.5 A g <sup>-1</sup> ,<br>185 mAh g <sup>-1</sup> at 1.0 A g <sup>-1</sup> ,<br>135 mAh g <sup>-1</sup> at 2.0 A g <sup>-1</sup>                                                                                                                                                                                                                           | 120 mAh g <sup>-1</sup> after 500 cycles at 2 A g <sup>-1</sup>     |
| CAPC1100 <sup>8</sup> | 233.7 mAh g <sup>-1</sup> at 0.5 A g <sup>-1</sup> ,<br>208.7 mAh g <sup>-1</sup> at 1.0 A g <sup>-1</sup> ,<br>196.6 mAh g <sup>-1</sup> at 1.5 A g <sup>-1</sup> ,<br>189.7 mAh g <sup>-1</sup> at 2.0 A g <sup>-1</sup> ,<br>177.3 mAh g <sup>-1</sup> at 2.5 A g <sup>-1</sup>                                                                                                                                                                                                                 | 171.5 mAh g <sup>-1</sup> after 500 cycles at 1.5 A g <sup>-1</sup> |
| NOC@GF <sup>9</sup>   | 340 mAh g <sup>-1</sup> at 0.1 A g <sup>-1</sup> ,<br>329 mAh g <sup>-1</sup> at 0.2 A g <sup>-1</sup> ,<br>306 mAh g <sup>-1</sup> at 0.5 A g <sup>-1</sup> ,<br>287 mAh g <sup>-1</sup> at 0.8 A g <sup>-1</sup> ,<br>272 mAh g <sup>-1</sup> at 1.0 A g <sup>-1</sup> ,<br>186 mAh g <sup>-1</sup> at 2.0 A g <sup>-1</sup> ,<br>151 mAh g <sup>-1</sup> at 3.0 A g <sup>-1</sup> ,<br>134 mAh g <sup>-1</sup> at 4.0 A g <sup>-1</sup> ,<br>123 mAh g <sup>-1</sup> at 5.0 A g <sup>-1</sup> , | 281 mAh g <sup>-1</sup> after 5500 cycles at 1.0 A g <sup>-1</sup>  |
| SC-500 <sup>10</sup>  | 175 mAh g <sup>-1</sup> at 0.05 A g <sup>-1</sup> ,<br>150 mAh g <sup>-1</sup> at 0.1 A g <sup>-1</sup> ,<br>118 mAh g <sup>-1</sup> at 0.2 A g <sup>-1</sup> ,<br>93 mAh g <sup>-1</sup> at 0.4 A g <sup>-1</sup> ,<br>70 mAh g <sup>-1</sup> at 0.8 A g <sup>-1</sup> ,                                                                                                                                                                                                                          | 196 mAh g <sup>-1</sup> after 900 cycles at 0.05 A g <sup>-1</sup>  |



|                         |                                                                                                                                                                                                                                                                                     |                                                                          |
|-------------------------|-------------------------------------------------------------------------------------------------------------------------------------------------------------------------------------------------------------------------------------------------------------------------------------|--------------------------------------------------------------------------|
| CDs @ rGO <sup>11</sup> | 309 mAh g <sup>-1</sup> at 0.1 A g <sup>-1</sup> ,<br>270 mAh g <sup>-1</sup> at 0.2 A g <sup>-1</sup> ,<br>250 mAh g <sup>-1</sup> at 0.3 A g <sup>-1</sup> ,<br>227 mAh g <sup>-1</sup> at 0.4 A g <sup>-1</sup> ,<br>221 mAh g <sup>-1</sup> at 0.5 A g <sup>-1</sup> ,          | 244 mAh g <sup>-1</sup> after 840<br>cycles at 0.2 A g <sup>-1</sup>     |
| KTO/C-700 <sup>12</sup> | 122.5 mAh g <sup>-1</sup> at 0.02 A g <sup>-1</sup> ,<br>104.3 mAh g <sup>-1</sup> at 0.05 A g <sup>-1</sup> ,<br>92.3 mAh g <sup>-1</sup> at 0.1 A g <sup>-1</sup> ,<br>78.6 mAh g <sup>-1</sup> at 0.2 A g <sup>-1</sup> ,<br>65.1 mAh g <sup>-1</sup> at 0.5 A g <sup>-1</sup> , | 118.5 mAh g <sup>-1</sup> after 200<br>cycles at 0.025 A g <sup>-1</sup> |

## References

- 1 D. Li, Y. Jia, G. Chang, J. Chen, H. Liu, J. Wang, Y. Hu, Y. Xia, D. Yang and X. Yao, *Chem*, 2018, **4**, 2345-2356.
- 2 Y. Cui, W. Liu, Y. Lyu, Y. Zhang, H. Wang, Y. Liu and D. Li, *J. Mater. Chem. A*, 2018, **6**, 18276-18285.
- 3 W. Yang, J. Zhou, S. Wang, Z. Wang, F. Lv, W. Zhang, W. Zhang, Q. Sun and S. Guo, *ACS Energy Lett.*, 2020, **5**, 1653-1661.
- 4 J. Li, W. Qin, J. Xie, H. Lei, Y. Zhu, W. Huang, X. Xu, Z. Zhao and W. Mai, *Nano Energy*, 2018, **53**, 415-424.
- 5 C. Lv, W. Xu, H. Liu, L. Zhang, S. Chen, X. Yang, X. Xu and D. Yang, *Small*, 2019, **15**, e1900816.
- 6 H. Li, Z. Cheng, Q. Zhang, A. Natan, Y. Yang, D. Cao and H. Zhu, *Nano Lett.*, 2018, **18**, 7407-7413.
- 7 B. Xu, S. Qi, F. Li, X. Peng, J. Cai, J. Liang and J. Ma, *Chin. Chem. Lett.*, 2020, **31**, 217-222.
- 8 B. Wang, F. Yuan, W. Li, Q. Wang, X. Ma, L. Gu, H. Sun, K. Xi, D. Zhang and W. Wang, *Nano Energy*, 2020, **75**, 104979.
- 9 S. Zeng, X. Chen, R. Xu, X. Wu, Y. Feng, H. Zhang, S. Peng and Y. Yu, *Nano Energy*, 2020, **73**, 104807.
- 10 L. Tao, L. Liu, R. Chang, H. He, P. Zhao and J. Liu, *J. Power Sources*, 2020, **463**, 228172.
- 11 E. Zhang, X. Jia, B. Wang, J. Wang, X. Yu and B. Lu, *Adv. Sci.*, 2020, **7**, 2000470.
- 12 C. Liu, H. Wang, S. Zhang, M. Han, Y. Cao, S. Liu, Z. Yang, A. Chen and J. Sun, *Nanoscale*, 2020, **12**, 11427-11434.
